# Supplementary material for: Playing the role of weak clique property in link prediction: A friend recommendation model
Source: PubMed Central journal article supplement (PMC4954950; doi:10.1038/srep30098), 2016-07-21
Supplement: srep30098-s1.pdf [file srep30098-s1.pdf]

## Supplementary Information for

# Playing the role of weak clique property in link prediction: A friend recommendation model

Chuang Ma,<sup>1</sup> Tao Zhou,<sup>2</sup> and Hai-Feng Zhang<sup>1,3,4</sup>

<sup>1</sup>*School of Mathematical Science, Anhui University, Hefei 230601, China*

<sup>2</sup>*Web Sciences Center, University of Electronic Science and Technology of China, Chengdu 610054, China*

<sup>3</sup>*Key Laboratory of Computer Network and Information Integration (Southeast University), Ministry of Education, 211189, P. R. China*

<sup>4</sup>*Center of Information Support & Assurance Technology, Anhui University, Hefei 230601, China*

(Dated: May 19, 2016)

### TYPICAL PWCS PHENOMENON

To confirm that the PWCS phenomenon typically exists in real networks, we also calculate the values of  $P_1$ ,  $P_2$  and  $P_3$  in other 15 real networks, including networks with small sizes and large sizes. The definitions of  $P_1$ ,  $P_2$  and  $P_3$  are given in Eqs. (1), (2) and (3) in main text, respectively. We say that the PWCS phenomenon exists in the network if  $P_1 > P_2$  and  $P_1 > P_3$ . Furthermore, the PWCS phenomenon is significant if  $P_1 > P_2 > P_3$ , otherwise, the PWCS phenomenon is weak when  $P_1 > P_3 \geq P_2$ . From Tab. S1, we can find that  $P_1 > P_2$  and  $P_1 > P_3$  in all 15 real networks, and there are 6 networks having significant PWCS phenomenon (labelled in blue color).

### COMPARISON OF FOUR INDICES IN NETWORKS WITH LARGE SIZES

On the one hand, to prove that our FR index is a local similarity index and can deal with networks with large sizes; on the other hand, to compare the effects of CN, AA, RA and our FR indices on Precision. In Fig. S1 we plot Precision as a function of  $L$  for the four indices in six real networks. The network size spans from  $N = 16706$  to  $N = 325729$  (The basic information for the six networks is presented in Tab. S2). In general, the results in Fig. S1 indicate that our proposed FR index has a better performance for a large range of  $L$ .

- 
- [1] Newman M E J. The structure of scientific collaboration networks, Proceedings of the National Academy of Sciences, 2001: 98(2): 404-409.
- [2] Leskovec J, Kleinberg J, Faloutsos C. Graphs over time: densification laws, shrinking diameters and possible explanations, Proceedings of the eleventh ACM SIGKDD international conference on Knowledge discovery in data mining. ACM, 2005: 177-187.

Table S1: The values of  $P_1$ ,  $P_2$  and  $P_3$  in 15 real networks are reported. Results in networks with significant PWCS, i.e.,  $P_1 > P_2 > P_3$  are shown in blue color.  $N$  is the size of network.

| Network     | N     | $P_1$  | $P_2$  | $P_3$  |
|-------------|-------|--------|--------|--------|
| Dolphins    | 62    | 0.4678 | 0.1920 | 0.2760 |
| Email       | 1133  | 0.3088 | 0.1107 | 0.0902 |
| Facebook    | 334   | 0.7101 | 0.2311 | 0.3089 |
| Karate      | 34    | 0.5417 | 0.1587 | 0.2389 |
| Kohonen     | 4469  | 0.06   | 0.0238 | 0.0191 |
| Lesmis      | 77    | 0.8818 | 0.2828 | 0.4397 |
| SciMet      | 3084  | 0.1814 | 0.0746 | 0.0538 |
| Adjacencies | 112   | 0.1684 | 0.1679 | 0.1078 |
| Football    | 115   | 0.9292 | 0.2082 | 0.4206 |
| Hep         | 8361  | 0.5846 | 0.1682 | 0.2995 |
| Y2H         | 2112  | 0.3397 | 0.0728 | 0.0184 |
| PGP         | 10680 | 0.5439 | 0.0760 | 0.1170 |
| SmaGri      | 1059  | 0.1561 | 0.0615 | 0.0531 |
| Astro-phys  | 16706 | 0.5973 | 0.1405 | 0.3042 |
| Hep-th      | 27240 | 0.1703 | 0.0694 | 0.0874 |

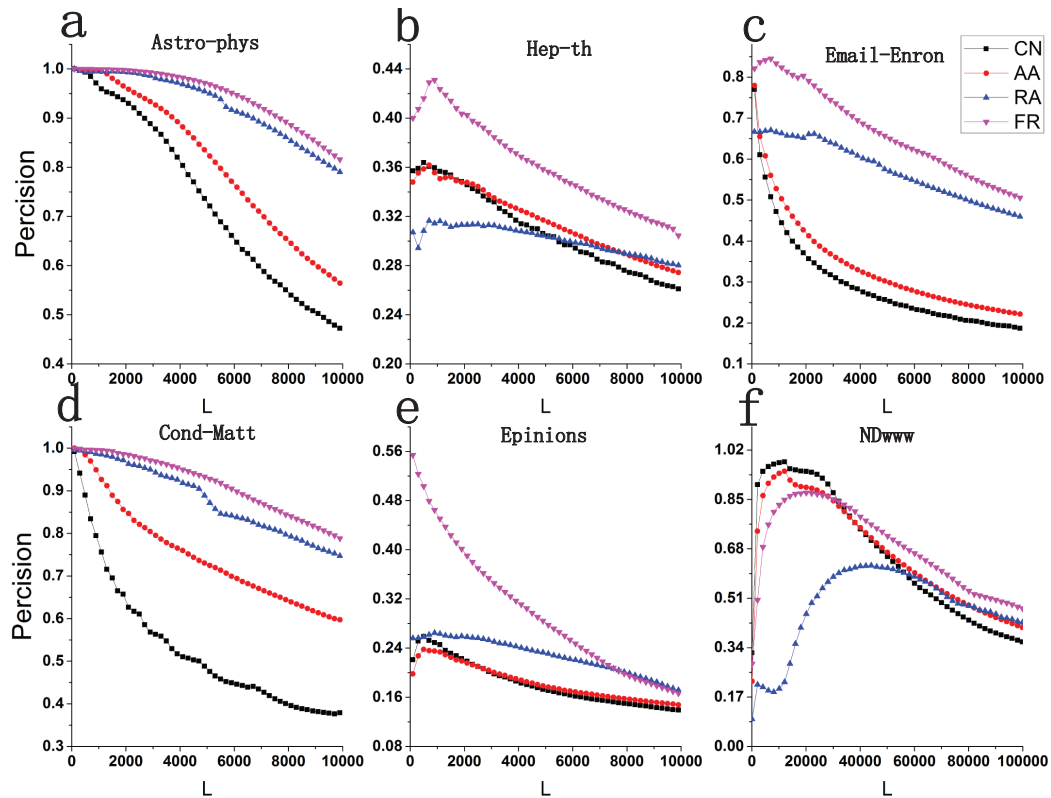

Figure S1: Precision as a function of  $L$  is compared in six real networks for CN, AA, RA and FR indices.

Table S2: Basic information about the six real networks used in Fig. S1.  $N$  is the size of network.

| Network     | $N$    | Reference |
|-------------|--------|-----------|
| Astro-phys  | 16706  | [1]       |
| Astro-phys  | 27770  | [2]       |
| Email-Enron | 36692  | [3]       |
| Cond-Matt   | 40421  | [1]       |
| Epinions    | 75879  | [4]       |
| NDwww       | 325729 | [5]       |

- [3] Leskovec J, Lang K J, Dasgupta A, et al. Community structure in large networks: Natural cluster sizes and the absence of large well-defined clusters, *Internet Mathematics*, 2009, 6(1): 29-123.
- [4] Richardson M, Agrawal R, Domingos P. Trust management for the semantic web, *The Semantic Web-ISWC 2003*. Springer Berlin Heidelberg, 2003: 351-368.
- [5] Albert R, Jeong H, Barabási A L. Internet: Diameter of the world-wide web. *Nature*, 1999, 401(6749): 130-131.
